# Supplementary material
Source: publisher site journal article supplement (https://www.dovepress.com/article/503539)
Supplement: Supplementary file 1 [file get_supplementary_file.php]

Table S1. Result of the exposure analysis

| **chr.exposure** | **pos.exposure** | **beta.exposure** | **se.exposure** | **pval.exposure** | **samplesize.exposure** | **id.exposure** | **SNP** | **effect_allele.exposure** | **other_allele.exposure** | **eaf.exposure** |
| --- | --- | --- | --- | --- | --- | --- | --- | --- | --- | --- |
| 1 | 102349196 | -0.266 | 0.0557 | 1.76E-06 | 34467 | ebi-a-GCST90014288 | rs12116715 | T | C | 0.0976 |
| 2 | 111438820 | -0.3915 | 0.0831 | 2.48E-06 | 34467 | ebi-a-GCST90014288 | rs13412647 | G | A | 0.0375 |
| 2 | 38298139 | 0.1834 | 0.037 | 6.97E-07 | 34467 | ebi-a-GCST90014288 | rs1800440 | C | T | 0.1885 |
| 2 | 233282536 | -0.1676 | 0.0355 | 2.34E-06 | 34467 | ebi-a-GCST90014288 | rs790051 | A | G | 0.2169 |
| 2 | 160064299 | 0.151 | 0.0302 | 5.57E-07 | 34467 | ebi-a-GCST90014288 | rs6709296 | T | G | 0.4237 |
| 2 | 200688448 | 0.1641 | 0.032 | 2.96E-07 | 34467 | ebi-a-GCST90014288 | rs1837188 | C | T | 0.3541 |
| 3 | 156232751 | -0.2347 | 0.0498 | 2.46E-06 | 34467 | ebi-a-GCST90014288 | rs3817367 | G | T | 0.1021 |
| 3 | 128305302 | 0.1456 | 0.0309 | 2.51E-06 | 34467 | ebi-a-GCST90014288 | rs2010054 | G | A | 0.6028 |
| 4 | 113619002 | -0.2246 | 0.0418 | 7.52E-08 | 34467 | ebi-a-GCST90014288 | rs9790675 | G | A | 0.1647 |
| 4 | 186840057 | 0.2283 | 0.0497 | 4.46E-06 | 34467 | ebi-a-GCST90014288 | rs77488658 | C | T | 0.1088 |
| 5 | 158487055 | 0.59 | 0.12 | 8.88E-07 | 34467 | ebi-a-GCST90014288 | rs138988771 | A | G | 0.0246 |
| 5 | 149251539 | -0.3752 | 0.0806 | 3.19E-06 | 34467 | ebi-a-GCST90014288 | rs6886532 | T | C | 0.0537 |
| 5 | 114419524 | -0.5517 | 0.1181 | 2.97E-06 | 34467 | ebi-a-GCST90014288 | rs115227173 | T | C | 0.0265 |
| 6 | 109618704 | 0.1983 | 0.0294 | 1.64E-11 | 34467 | ebi-a-GCST90014288 | rs9386796 | T | C | 0.4597 |
| 6 | 31143511 | -0.1928 | 0.031 | 5.09E-10 | 34467 | ebi-a-GCST90014288 | rs887466 | A | G | 0.3815 |
| 6 | 147225918 | 1.0581 | 0.2214 | 1.75E-06 | 34467 | ebi-a-GCST90014288 | rs148545630 | T | C | 0.0118 |
| 8 | 128394538 | 0.1657 | 0.0353 | 2.75E-06 | 34467 | ebi-a-GCST90014288 | rs1949808 | C | G | 0.7035 |
| 9 | 30060627 | -0.154 | 0.0327 | 2.48E-06 | 34467 | ebi-a-GCST90014288 | rs2813943 | C | G | 0.631 |
| 10 | 101280279 | 0.18 | 0.0323 | 2.55E-08 | 34467 | ebi-a-GCST90014288 | rs17094148 | G | A | 0.2933 |
| 10 | 80421876 | -0.1908 | 0.0399 | 1.71E-06 | 34467 | ebi-a-GCST90014288 | rs16936235 | C | T | 0.169 |
| 10 | 18392126 | 0.1787 | 0.0386 | 3.75E-06 | 34467 | ebi-a-GCST90014288 | rs7919238 | C | T | 0.2017 |
| 11 | 11853263 | 0.2802 | 0.0598 | 2.78E-06 | 34467 | ebi-a-GCST90014288 | rs76183373 | T | C | 0.0741 |
| 13 | 103785346 | 0.2962 | 0.0631 | 2.68E-06 | 34467 | ebi-a-GCST90014288 | rs72659772 | T | C | 0.0708 |
| 15 | 79972880 | -0.1737 | 0.0348 | 5.87E-07 | 34467 | ebi-a-GCST90014288 | rs17279885 | A | G | 0.2408 |
| 17 | 38143548 | -0.1703 | 0.0296 | 8.78E-09 | 34467 | ebi-a-GCST90014288 | rs4065321 | T | C | 0.5333 |
| 19 | 17020688 | -0.174 | 0.0359 | 1.22E-06 | 34467 | ebi-a-GCST90014288 | rs773853 | G | A | 0.6514 |

Table S2. Result of the MR analysis

|  | **id.exposure** | **id.outcome** | **outcome** | **exposure** | **method** | **nsnp** | **b** | **se** | **pval** |
| --- | --- | --- | --- | --- | --- | --- | --- | --- | --- |
| 1 | ebi-a-GCST90014288 | ebi-a-GCST90018800 | Brain tumor || id:ebi-a-GCST90018800 | || id:ebi-a-GCST90014288 | MR Egger | 26 | 0.057494372 | 0.15634525 | 0.7162905 |
| 2 | ebi-a-GCST90014288 | ebi-a-GCST90018800 | Brain tumor || id:ebi-a-GCST90018800 | || id:ebi-a-GCST90014288 | Weighted median | 26 | -0.00877922 | 0.0733788 | 0.9047664 |
| 3 | ebi-a-GCST90014288 | ebi-a-GCST90018800 | Brain tumor || id:ebi-a-GCST90018800 | || id:ebi-a-GCST90014288 | Inverse variance weighted | 26 | -0.006123583 | 0.05292035 | 0.9078798 |
| 4 | ebi-a-GCST90014288 | ebi-a-GCST90018800 | Brain tumor || id:ebi-a-GCST90018800 | || id:ebi-a-GCST90014288 | Simple mode | 26 | -0.003901797 | 0.15848633 | 0.9805542 |
| 5 | ebi-a-GCST90014288 | ebi-a-GCST90018800 | Brain tumor || id:ebi-a-GCST90018800 | || id:ebi-a-GCST90014288 | Weighted mode | 26 | -0.011913988 | 0.15059655 | 0.9375734 |

Table S3. Result of the outcome analysis

|  | **SNP** | **chr** | **pos** | **beta.outcome** | **se.outcome** | **samplesize.outcome** | **pval.outcome** | **eaf.outcome** | **effect_allele.outcome** | **other_allele.outcome** |
| --- | --- | --- | --- | --- | --- | --- | --- | --- | --- | --- |
| 1 | rs887466 | 6 | 31143511 | 0.0597 | 0.0423 | 491542 | 0.1581 | 0.449448 | A | G |
| 2 | rs3817367 | 3 | 156232751 | 0.0813 | 0.078 | 491542 | 0.2974 | 0.0778484 | G | T |
| 3 | rs9386796 | 6 | 109618704 | -0.0352 | 0.0456 | 491542 | 0.4398 | 0.371389 | T | C |
| 4 | rs16936235 | 10 | 80421876 | 0.056 | 0.0665 | 491542 | 0.3994 | 0.163108 | C | T |
| 5 | rs17094148 | 10 | 101280279 | 0.0394 | 0.0426 | 491542 | 0.3553 | 0.348891 | G | A |
| 6 | rs138988771 | 5 | 158487055 | -0.0516 | 0.1736 | 491542 | 0.7665 | 0.020532 | A | G |
| 7 | rs1837188 | 2 | 200688448 | -0.0679 | 0.043 | 491542 | 0.1149 | 0.35067 | C | T |
| 8 | rs148545630 | 6 | 147225918 | -0.3344 | 0.2243 | 491542 | 0.1359 | 0.0140019 | T | C |
| 9 | rs9790675 | 4 | 113619002 | 0.002 | 0.0565 | 491542 | 0.9711 | 0.192162 | G | A |
| 10 | rs2010054 | 3 | 128305302 | 0.0058 | 0.041 | 491542 | 0.8875 | 0.58248 | G | A |
| 11 | rs1949808 | 8 | 128394538 | -0.0079 | 0.0453 | 491542 | 0.8615 | 0.689865 | C | G |
| 12 | rs2813943 | 9 | 30060627 | -0.0293 | 0.0453 | 491542 | 0.517201 | 0.685517 | C | G |
| 13 | rs77488658 | 4 | 186840057 | 0.1058 | 0.0626 | 491542 | 0.0908009 | 0.115271 | C | T |
| 14 | rs790051 | 2 | 233282536 | 0.0391 | 0.0553 | 491542 | 0.4786 | 0.174179 | A | G |
| 15 | rs72659772 | 13 | 103785346 | 0.0065 | 0.0885 | 491542 | 0.9411 | 0.0595437 | T | C |
| 16 | rs17279885 | 15 | 79972880 | 0.0188 | 0.046 | 491542 | 0.6827 | 0.263221 | A | G |
| 17 | rs1800440 | 2 | 38298139 | 0.1516 | 0.0644 | 491542 | 0.0185601 | 0.12939 | C | T |
| 18 | rs6709296 | 2 | 160064299 | 0.0232 | 0.0461 | 491542 | 0.6148 | 0.579245 | T | G |
| 19 | rs13412647 | 2 | 111438820 | -0.0944 | 0.108 | 491542 | 0.3818 | 0.0424432 | G | A |
| 20 | rs115227173 | 5 | 114419524 | -0.1337 | 0.1457 | 491542 | 0.3588 | 0.030686 | T | C |
| 21 | rs76183373 | 11 | 11853263 | 0.0282 | 0.0605 | 491542 | 0.641501 | 0.129708 | T | C |
| 22 | rs7919238 | 10 | 18392126 | 0.0149 | 0.0469 | 491542 | 0.7508 | 0.330582 | C | T |
| 23 | rs12116715 | 1 | 102349196 | -0.0024 | 0.0818 | 491542 | 0.977 | 0.108251 | T | C |
| 24 | rs6886532 | 5 | 149251539 | -0.1432 | 0.0883 | 491542 | 0.1049 | 0.0560584 | T | C |
| 25 | rs773853 | 19 | 17020688 | 0.0217 | 0.042 | 491542 | 0.6056 | 0.604907 | G | A |
| 26 | rs4065321 | 17 | 38143548 | 0.0458 | 0.0411 | 491542 | 0.2651 | 0.468876 | T | C |
